# Supplementary material
Source: PubMed Central journal article supplement (PMC4713261)
Supplement: NIHMS742595-supplement-2.pdf [file NIHMS742595-supplement-2.pdf]

## The location of transcription factor (TF)-binding motifs within the 11 functional DhMRs

### TF-binding motifs in hyper-DhMRs

Yellow AAAC/AAA/GAA

Green CTGG/TCC/TTC

### TF-binding motifs in hypo-DhMRs

Brown GGAAGG/CA

Blue CACGT/C

Red TTTTAAAA

### *Enpp2*

CACTGGGGATAGACTGATTCCTCTATGGATAAAGTACTAGCTTGTAACCAACCAGACTCAAGGTCACCTTG  
GTCACCTTCAAGGTGAGAATGCGAGGTTTAGGTGGTTCCAACCTCAGCAACTGATGGACACCTATGTGATCA  
CACCACCAAATGTATCAGAGGGTTCTCAGCTTGCAATGTTCAACCAAGGACAAATGAAACTAGAAATGACA  
AGCAGTCCGTCCTGAATGAATTCATACACATCAGGACTTTTGGCAGGAAAGAGGACTATGTGTTTAGAAA  
TCCTCTTGAAAAGACCGCACTCAGACTCTTGCTGTGGGAAGCTGGCCCCCTTCTGAGGCAACAACGGTT  
CCATAAGTATTGTCTGGAAATCCGGAGAGTAGCAACCTCTAACCGTCAAGTGAAGGAGAGACCCCAGTGC  
TAGGAAAACCAGCCCCTGATTTGCTAATGGTGCAAAGGTGAATTAAAGCAGCAGGCCCTTGCTGTCTACCT  
AGCTACCTTATTTCTTGGCAAGACTGTTCCAAGAGCCACTGGGATGCAGGCAGGGCAGGAAGAAGAACGG  
TGTTAGTGTAAACCAAGGGGACATCTGCCATGCTGTTGCTCTTTTCGCAGGGCAAGCAGCTGCACGAGCA  
TTTCTGGTTCTATCTCATCCTCTCTCCTGCAGAGCGATCAGAAGTCACAGCCCTGTAGACTTTGGTTT  
GGTTTGTCTTGGTTTTAATGCTTCTAGTTTAGGCACGTCTCCATGAGAAGAGCAGGAAAAGGAAGAGGG  
TTTTTCCATGTCATGGTCACTGAGTACATTCTGCGAGCGCTCGAATACTGCCCATCAAACCTAAGCCAT  
TTGCAAGAACTCCAACATTCCAAAGACGCCCAAAGAGAACCCTTCCAATTGCAGCAGGTTAGAAGAGCA  
GAAGAAAGGGAGTGTAAAGCAGATGGAGTTTTTATCCAATCATTACAAAGGCATGTTTCTCCTTCTTCGGA  
TGTTAGGGGTAGATGGAAAGCTGTTTTCACTGTCCAGCCATACTCAGCCTGAATTTAGAAGTTTAGCC  
TGAGGTTATTAGAGAAATGGGAGAGGGGCGGGGTGCAAATTTCCCTGCCTTTCAGAAGGATTCTTTACCA  
TCTGAAGGTAGGGACCAGCCAGCCAAAGCTCTGCCTCTAGGCCCAGAAGAGCAGCCGAACAACATGTCAC  
AGAGAAAGCATAGATCAAAGAGACCAAAAAAAAAAAAAAAAAAAAAAAAGATTGTGCCAATATTCCAAG  
CAAGCATATTTTGAACATTACCATTACACTATGAAAGCAGGAGCAATACACCATTTCTCCAAACTGTTA  
GCCCCGTGTTTGGCCATCTCAGTAAATAGCTTTTGGAGACTCACCCCTGAAAAACAAGTGTACTCAAATATT  
AAGCAAATAAACACAAACGTCAATTGAATTCATCTTACTGTGCCCTATAGCACTTTGCTACTTAGCCTC  
GTTTCCATTCAATTTCTAATGGCAAATTCCTTTTCTGTTCCCTGTCAAAGTTACATAAGCTTCGTATT  
CTTTTCATCTAGTGTGTGCAGTGCTCCCGTGCACACTTATGGTCTCTGACAATACACAGGTGTTTATACGT  
GAACGTAGGTGCTTATGATAGACAGGGATGTGAGCCAATCAAGCTTATCGCATGAGAAAGGTTTGCTGGC

TTGCCTTGGCTCTAGTTTAGCAGAATAAACTATTTTTATCTTGTTCAGGAGAAGTTTCTTAGACCCAT  
GAGAAACAGT

*Sostdc1*

ACTAAGTATATTTAAGTGCTTTAACCTCTCTTCTAGTCTGCCACCCACTTGAGGTAGAGGAAAGAAAAGG  
TTAATAGGACAAAGGAGGATGTGGACCTGTTTAGAAATAGTCCTTTGTGGTGAATCCAGTCTGCTATGTC  
ATGATATCAGTGGTTCGGTTCACATGAATCAGCAGTGGTAGCTAGAATGACTTGCAAACGTCATTCATGA  
ATCAAAAAATGGCAGTTTGATCCAGAAGAAACCTTGAGGCTCTGTCAATTGGCCTAAGCCTGCAGAAGAG  
GCAAGAAGCCCTCATACTCCACGGCAAGTTTTTCTTGTGTTTTCTCTTTACAAAGTCACAACAAATGAT  
GATCAGCAAAGAGTGGCAAGGCAAACAGTACCAAACAGCATCCTCAGTGAAGATCAGCATCAGCAAAC  
CCAACGAGGACCAACAAAGAGTGGCAAGGCAAACCTCATACCACACTGTGTCACCCACTGACTGTTGGGTT  
ATAGTGATACCATTTCCAAACATCACATGATGGCATTGGAGATGAGCAATTTCAAGGCAAAATGATATAT  
GAGTATGAAAATATAATAATGTCACTCTGGGAGGAAGGCTGCTGGGTAGAAGAAGTGGCCATACAACCTTG  
ACACCCCGTGTGGATTGCCGCCAAAAGTTGTCTCTGACATCCACCTGTGAGCTCTCGTGTGAGCGCAC  
CTATATTCACACACAATATATTACACAAACAATACGTGCAATAATAATAAAACGTAAAAGAAAATGTTGCC  
TACTAAAAATATACTCACAAAAAATATATGTGCAGGGAAGAGATTTAGCTCAGTGGTAGAGTGCACAT  
TTTGCATAAATAAGGTTCTGTGTTCAATCCCAGTACGTCAAAAAGAACAGTAAAATCAATAACAGCAAC  
GCGTGTCAAAAGAAAATCCATCAAGGAGTGTTTTACACAGCGCTCAGGGCACAAATCAGTTCTATATGGA  
ATTCAGCTCATAGGACTGGGAGCTTCAGGGAAAAAATCCTCAAAGTATCCTTGTGCTGTTTTAAAGA  
AAGTAGCTGACCTAACAGTGTAGGATGTAACCTGTGTCTCTTGGGAAAATGGGACATTGACAAGACGAT  
CCTATGATTCTATGCCCCGTTTCTATCTCCAGGTGGAGACCTATGCTTTAAGCAGTGCCTGTTGCTTCCA  
ATCAGTTCATAACATCCCATTCCCCTTCATACCTTTCTTTGCTATAATTCTGATCGGTACCATTTAGG  
GCTCAGTCGCCTGGTTTTCTTTCTTGTCTGCGTTTTCTAGTTCAGGTATTCTCCTCAGTGTCCCATAGTTT  
GAGCTAAGATGTGAGGACTCTCAGCTGAGTGAACTATGAGTATTTTGAAGTGCAGTTCCTCCACAGTC  
CTTTGCTGTTATCTGTGGCTCCAGACTGGTCAAATCCCTACTTCGCTCAAATCCTTCTAAGGGTCCCTC  
CCCCTGAATTTAGATTAAAACCTCAAACCTTTTCTAGTTTTGCAGAGGACAAACAATGGTGCCTTGAATCTT  
CCACCTCTTCTGTAACCTCCTCCACGGAAGGCAGAAGGCATTTTCATGTCAGGCACCTCAGCGTGCAGCTTG  
CTGCCAGGCATGGGCATGCGCTCT

*Ulk4*

CCACCTGGTTTTCTGTACTTCAACAGAGACATTAACCTTTGGAGACACTATGTAGTTATTGATTTTTGTG  
GAGGACTTTTGTTCAAATGCTCCAAGGAAGTCTTTATTTTATAGTGTGTGTGTGTGTGTGTGTGTGTG  
TGTGTGTGTGTAACAGTATGTATATACATGTGTACGCCTGTGTGTAGTTCAGCTTGCCAAAGGAAGTTTT  
CTCTTTCCACCATGTGGGCATGGAGCCCAGTCATCAGGATTGGCAGTCAGAGCTGAAACACCTAGCCACC  
TCTATTTGTTATTATTTTCTTGTGTTGTTTCTGAGAGAGGATCTCAGGTGTCTTAGTCCGGCCTCAAACAC  
ACTATGTAGTAGTCAAGGGTGACCTTGAATTTCTGGTCTCCTGCCTCCACCTCTGAAGTTCTGGAGTTG  
CAGGCCGTCCCCACCACCCAGTTTATGTGGTGTCTCAGAATCAAGTCCAGGACACCCTGCATGCTAGCC  
ATGGCTCCCTGCGTGCTAGCCAGACAAACAGCCATGTGGACACCCTACACCAGCACAGTGGCACTGGTATT  
GCTGGTGACCCTCTGCAGGCTCCCTTTAGGACATCATCCATACTTGTCTGGTGCCAAGAGCGAGTGAGCC  
TGCATAAGGGACATTTCCATCCTTTTCTGTGACATGGGGGTGGAGAGCTTGACTGTTGGAGCTGTGAATT  
GTGTTAAATCGGAGCCAATCAGAAGCTGCTTCAGTTAGCAAAGATTCTCGGCAGCTGGCAGCCGGTGA

GACACTTGACAGTGCTGAGTGCTGAAGGTATAAGAATGTGTGTCGATCACCCCACAGAAAGAGCAGCTGG  
GGTGGGCGTGGTGGCACAGGCACTCTGGAGATGGAGTCTGGAGTCTGTCAGATTGGACTACACGACCTGG  
GCTACACATGAGACCCCATCTTTAAAGAAGAACAACAAAACCTAAACATCACCTGGTGCCAGAGGCTGG  
CTGGGCCTACGCATCTCCTCAGTGGGTGCTTTGGTACCTATTCCATAGCAGCTTCACTCATGAGACCCCC  
CCTCCCCAAACTGAAACCCCCAAATGCCATTTCAGTGGGAACAGGGACAAACCACACAATGGAGTATTACT  
CAGCCAGGAGAAAGAATGAGGCATGAATGCATTCAACAAACACCTGAACGTTGCAGACAGAATGTTGAGC  
AAAAGAGGCCGATGCACAAGGCCATTCCGGAGGATTGCAGAATAATTTTTTTTTTACACCAGAGATGTGGA  
TGTGTCCCGCAAAGTAGTACACAAAGGGACACTGCCAGTGTGAGCCGTAATTTAAACCTGTGAAGGAGTT  
CTAGTTAATTTGTCTGCTCTCAGGTGGGAACCTCATCAGGCAGTAAAATGAAATAAATGGGACCCGGCAGG  
GTGGCTCAGGAAGTGAAGGTGCTTGTGGCCAAGTCTGAGGACCTGAGTTCATCCCTGGCACCCACAGGT  
GGAAGGAAGAGACCAACTCCTGAAATTTGCTCTGTAACCTCCATATATGTGTGCATGGCTGACA CACGCACA  
CACACAAAGCACACACCTACACACACTTTGTGAGGTGGTTCCTTAAGGTGACTGACAGTTATCCAGTCTTC  
AGGGTGGGTGATGGAACCTGAGTGTTTTGTGTTTATTTTTTTTCCCGTTTTCTAAGGGTGTTTTATTCT  
TCTGACTCGAGCACTTGCTTGGGGTTT CAGAATTTAAAGGAGAGTG AAAAAAAAAA AAATCTCAGGAATTAC  
GATCAGTCTTTTTTTCTTTTGTGAGTCAGGAATTGAACTCAGTACCTCCAGCCCACCATAAGCATGCAGTTG  
ACCCTGAGCCAGATCCTCAGCTCAGTATAAGTGGTTAT

*Wnt9a*

CTTAGGGCCACCTGGGGAGAGCCCCCCCCCACTACATTCTTGTGTCCCGCTGCTCTCTAAGATTTGA  
ATCAATATTTGAAGATACCCCGAGTGTGAGAGGCCAGGCAGGAGATTCCCTCGGGTGGAGCCCTAAATCCT  
GAGAAGGGAAAGGCCTAGCCAGGGTTCCCTGGCAGTTTACCAGACCTGAAATTTTGGTGTCTCGGCCATGC  
CTGCTCCTACCTGTGACCATGGGATGAACAGTGTCTGCCTCTTCTCCTGGGGAGTTAGTCCGGGAAGCCCT  
AGAAGGTGCATCACTTTCTTAAGAAGTTACCCTATCGAAAGCATACTTTTCTACCTCTCTCTGCACCTGC  
ACCCATGCCCCCTCACAGGCTGACACTTAAGTGGGTAGGGCTTGAGTCAAGTCTACTGGAGCTCTGCACTC  
AGGAGGGGTGAGGTCAGTCTAGACAGCCCCGAGGGAATCCTTGTCTTCATCCATCCGATGAGCAGCGTGC  
TGAGATCAGAAGTAGGAGACTGGCAAGGCTGTGATAGTTGACTGTTTGGGCAGGGATGGTTATAAGGGTA  
AGCAGGGAATGTTTCCAAGGGGGCGTGGACCAGGCTGTACTCATAGCCGTGCAGAGGTGCATCCTGGAC  
ATCAACGTGCTGGCCTTAGGACCTCTGTCCCCTGGCAGACTTGACTTGGAGG GGAAGGAAGCCAGCCTATC  
AGCCTATGATCCTAGTTGCTAGACTTTTGTGAGTGTGACAGTGTCTGCCCCCTGCTGGCCAGCCTCTGGTC  
TAAGTCTGTGTGAGGGTTGCAGAGTGGGCCACCAGGGTTGAGGTTCAGCCTCTCTGATGCCTCTGGGTC  
ATCCTGGCATGTCACTCATGTTCCCATCCCCCTTCCCCTTGCAGGTGATAAAGGCTGGAGTGGAACCAC  
TTGCAAATGCCATGGTGTGTCTGGCTCCTGCACCGTGCGGACCTGCTGGCGGCAGCTAGCACCCCTCCAC  
GAGGTGGGCAAGCACCTAAAACACAAATATGAGACCTCGCTCAAGGTGGGCAGCACTACCAATGAAGCCA  
CTGGAGAGGCAGGTGCCATCTCCCCACCGCGGGGCCGGGCTTCTGGGTGAGGAGGTGGCGACCCACTGCC  
CCGAACACCAGAGCTTGTACACCTGGACGACTCTCCAGCTTCTGCCTGGCTGGCCGCTTTTCCCCTGGC  
ACGGCAGGCCCGCAGGTGTCACCGGAGAAGAAGTGTGAGAGTATTTGTTGTGGCCGAGGCCACAACACAC  
AGAGTCGTGTGGTGACAAGGCCCTGCCAATGCCAGGTCCGCTGGTGTGCTACGTGGAGTGCAGGCAGTG  
TACACAGAGAGAGGAGGTCTATACCTGCAAGGGCTGACCCGAGGCCCTGCAGCTCCACCGCAAGCGGTGT  
GGACTTTGCACACAGCACCAGAAGAATTCTACACCTGCAGGAGCTGACTCCAACGGCCCTGCCAGCCTTT  
CTGCAGGGAGTGTAGGCTTTGCACATAGTGCAAAGGGTCTTAATCTGCATGGAGTGAGCCCTGCAGGTCC  
AGCCTATCCTGCTGTGTGGGGCACAGGGTTACAAACAACACAGAAGGTCTACAAGGATGAAGAGGTGCC  
CTAGCACACTTGGGCCCTGGTATACAGACAGCCAGTTGGCTGTCTCTCGGCCACAGGGCGGGGCTGGCC

CCTGTCTGGCCTGCTCAACCCTTTTGCCTTATGCCTTGGGCCTGAGCTTGGCCCCCTGACCCGAGAGCGTT  
GCAGTAATGCTTTCTCAGTTGCCTCTGTCCCTG

*Banp*

CAGCGAGCTCTGCATGCAGGGGTGGGGTGTGGTTGCTATGATCTAGGGTTTTTGTGACTCATCGGCTCAG  
ATTTTCAGCCCCTGAGCTGCTGTGCCAGACCCGGCATAAGCCTCTTGTGAAGGGAGGCCCTGCCAATCA  
TGGCCCCGTGACCCCTGGCCCTGTATTCTGTGGCCTTGCTAACTGTGTTACATTTTCTGTCTATATGTT  
ATATGTGTGGGGGGACATTGGGCATGCTCAGCCTTCCTCTCTTGATACAGGCTGCCTCCTTGACCTCAGG  
CTAGGCTCACAGTTAGCAAGTCCCAGCAGTCATCCTGTCTCTGCCCCAGCATTGGGAGATACAGACTCC  
ACATCCATGCTTGGCTTAGCAAGTGTTCCTTCCTCTCGAGCGTCTCCTCACCCCCATCGCCACATTTTAA  
TCTGGGTTGCCCCCTAGTTCTGCCTCAAGGGACACCTTTACCTGTTCTAGAAGCATGTTCCCTCGTCCGAT  
GGTGGGCACAGTCTCCACCACGTGACCTTTTCTCCTCTTGCTTAGCACAGAAGTTTGGCTCTGGTGTGG  
CCACCCGTTTTCCCTCATCTTGGTTTTGGTTTTGGTCTTATCTCAGTGGCCTGATCCGAGGTTATGAATGT  
GTTATGAATGCCTTTTCTTCTTCTGAGACTGCTAAAGCTTCAACTCTTACAGTCAGGTCCTCCACACATG  
CTGACCTCTGTGTGGTGCCAGGCAGAGTCCAACCTTCCTCTCCTATAGGGAGAACC GGTTGTCCCTCCA  
CCGTTTGTAGAAGCATGCCCTTTCTCTACCAGAGACCCGTTGACACGGGCGTTGAGAACCCACTGAGCAC  
AAACTCGAAGGCTGACTGCCGGGGTTACACCTTTAAAGTTAGGGTGAGTCTGGAGAGCCTGCTGCAGAGA  
GGTTTCATGAAGGGTGGCTTAGGACATGGCTGGCCCCCAGGAAAACACGCTGCAGGCGAGAAAGCAGCGGC  
AGGCCCTGTACGCATGCGCAGTGCAGAGCAGCCACTGGGGACACACTAGGGCACCCGGCCACGGTGCAGG  
CTCCCCTTCTCCAGCCTACCTCATCACCGTGCCAAACACAGCCTGGCCCCGTGAGCACCAACCTGGCTAGC  
AGGGATGGAAATAATTAGTGTCTTTCTGCAGAGATGGACGGTGACCTCAGGTGAGGGGCAGGACTTGAA  
TAGGATGTCTTGGTAACAAAGCCTCAGAGAAAACAGCCCCAAACAGAGGCTTCCCTCTATAGGAAATGT  
CCCATCTCTGTCTCCTCCAAGGCAGCACTTTAGCTTCAGATAGCCCCATGGGGTCTGCTTGCGGGGGGG  
GGGGGGCTGGCTGTGTGCCCCACGGGCTGCTTGGGGGTGGCTGGCTGTGTGCAAAGCTTTATGGGATCTA  
TGCTACACAAGATGATGTGAGGTGAGTACCCCAAGATCATGACTGTTGGTGTAACCTGTGAATTAAGGTG  
TCAGTGTCTCCACCAACAGAGGAAACAGGTCCTCCTAGCCACTGAAGTGAGAGCCAGGGCTCACTTGAGC  
CTTCTTACCCAGGTCACCTCTCTGTACAGTTTTTTCATGGTCCTGGAGTCTCATCCCTCAGGGCCTTCAG  
GATTCCTTGGTCTGTGTACACACTGGCCTGTGATGACACTAAGGTGAGCCTTCTCCAACCTCTGTTAG  
AATGATTGGGGAGGTGGCCCATCACAGAGCATTGAGTACCAGGGCATCCGGTACCAGACTCTGCAGCAGG  
AGGCCGAGCCTGCTGGCTCCTCTCTGAGCTACATCAAAACTTGGAGTTGGTGCCACTGCTGCCCTGAG  
TGTGTGTGTGTGGGGGGGAGGGACAGTGCCTGGGTCCCCACACCATTTATTAGCTGTATGCTGAAGT  
AGCTGTCAACGTGAAGGCCGAATGGAAGGCTACATCTTCCAGAGGCCTTCCATGCTTTCTTCCCACTGA  
AGCCTTTGCCCTGAGCACTTAGCATGTCCCCGGCCCTGGCTTCTCTGTGACGACGGGCAACTTCCCGGC  
TGTCCCCTTCCCTCCGCTCTGCTGAGCTGACTCTGTGAGTAGCCTTGCCACTGTTCCCTTCTCCATAGC  
TCTGCACATGCTGCATCAGCTGCCCTTGCCACTGCCTGGGGGACTGCCCTCTCCAGCTCTGCTCTAGCTG  
CTGGAAACAGCTGGTCCATTCTCCAAGACTGCCCTGGATGGATGGCCAGTCTAGAGCCAGGGCACTATA  
GGATGTGAGGCGACTAGCCCTCTCTGGTATGATGCCATACTGCAGGTGGACCTCCTCTGGTCCGTTTTCC  
TGCATGTGTAGACTTGAAGGCACATTGCAGAGGGTTGTGGATTAAGGATCTCTGTGTGCACTGGTGCAGT  
GTATGCCACAGAAGCTCTAGGCAGATTTGTCTTGGTACGTAAGGTTTCAGGCTGTCTGCCCTCTTCTTCA  
TGGGGATCGTTATGTCAGGCTTTGGTTTTCACTCCTGCTGCTCTTCCCAGGACGCCATGAATACGGT  
GCTCGTGAGCTTCCGGGACAAGGTGGATGAATGAACGGGCACAGGGAGTGGGAGTGGGGAGAGCGTGAGC  
TGAGCATCAATGACTGCTCCCCGGGTTCTCTGCTCAGCTTAGCTCCTGGAGAAAAGGGATGGCTGGGCTC  
CTTCTGACTTTGGCTTTTCCCTTCCGAGCAGACATCTCATCAAACGTTAGCTCTCTCCCCAGCCTACTT

CCTGTGATTTAAGACCTTAGCTATGCACTAAGGGATGCTCCATGCTCCCTGTTATAACAATAATGATTTTT  
AAAAAATCTTCACAGACAAATGAGCCAGCAGTATCTCTGTGTCCCTGGTGGAGGAAGGGCAGGGCTGTCT  
TTTTTTGTGTGTCAGAACGGGGCACTGAGGCTTGGTGTGAGACTTGAAGGTGGCTCCTCCTCAGTCTTAGC  
TGACAGCCTGTTTGACGGCAGAGGATCCCCTGACACTTAGGGCTCTGCCTCCATGGTAGTACTGCCTCTG  
TGGTGTGGATGTGGGAGCA

### *Cbfa2t3*

TGGCGGCCGGGGAACAGGCAGGACCTAGTGACAAAGTGGGGTTAGAGGACTGGTAGGTCCTTGGAGGGAG  
GACCAGAATGCATAGCTTGGCTGGTCAGAGGTTCTGAAGGGTAGGTACCCAGCTGAGATGTGTGTTTAGA  
GCACTGTCTTCCTTCCCCTCCCAGGGACCTCCTGTGAGCCTGCAGGGTCCCTGAGCAGGCAGAGATAC  
AGAGACACTTGTCACTGTAAGACCACACACAGGCAACCCTGCCGGGCTAGGACTGACTCCTTTCTTCTGT  
TTCAGTGACCATGTGACCTGCCAGTTTTTAATTATTATACCTTCCCAGGGAGGATCGTGGCTGGGTCCC  
CATCTGTCAACCTGGGCTGGTCATAGGCAGTATCTCTGAAGGTTTCTGCCCTACACGGGCCTCCGCCAGG  
GTCACCTTCCCTTGTCTGGAACAATGTCAGCTCAGCCGTCTCTCTGCCCTCCCAGACTCAGCTTTCAGACT  
TCAGCATCTGCACAGTGCCTGGGCTCCAGTACGGTCCCTGCCGGTGTGCTTGGTGTGTCTTCCCCTAAA  
ACCCTTCCCTCACTCTATCCATCCACGATGAAAGTGGTTCCTATCTCTTCCCTCTTCTGCGTCCCTCAGC  
AGCCATACCTATGAGGAGCACAGCCACATGTTTGTCTCTCCAGCCATGTGGGCAATGGGGTCTGTTGCTC  
CCCTACCCCTTCTCCATGCTAACTGCACCTTGCAGCTTCCCAGATGTGACCTCAAATAAAACCGGCTCC  
TCCTGCCCAGGCAGGCAGACTCCTCACCCATGTCCCCTCAGGGCCACTCCTCCTGAGGCAGCTCCACA  
ATCAAACACGCTGCCTCTATCTTCCAGGAAACCCTCCCTGACCTCCCTCTGCAGAGCAGGATGCACGACG  
CGCACTGTGCAGCGATACCTTATCAGCAAGGTTTGTGCGACTGGCGCCACCTTCTTCCACAGAGGCCGCA  
GTCTGTAGACCTCCTCCTGGCACCGTTGCTGCTGGCACAGAAAGATCTGTTGACAAGTCGGGCCCCACCA  
AGGGGGTCGGGGAGATAGGAGAGGCCAAGTCAGGGCTGTGAGAAGTCTGAATCGTAGCAGTCAAATAGCG  
AAGGGGAGCGGTGGCAGGCAGTGTGCCTCTGCTGTACCAGGCAGTGGCTCAGACCCAGGGAGACCTGTT  
TGTGCTCCACACATGGTCTTAGAGTCGCAGAGACATTTAGGAGTAGCTTCAACACAACCTTGGAAATGGGG  
GATGGAAGGTATGTGTCTCATTTATTCTTAGTGTACATGTGTTGAGTGGGTGTGCATGTACGTGTGTGCG  
CGAGTATGCATGTGAACATGCATGCATGTGTGTGTATGTGTGCGTGTGTGTGTGCATGTACATGCATG  
CATGTGAGCGTGTGTGTGTATGTGGGTGTGTATATGTGTCTGTGTGCGCGTGCATGTATGTGTGTGTGCA  
TATGGGCGTGCACATGCTACCAAGTACATGTGGAACGGGAGGATAACTGTGTATGAATCAGTTGTCTTC  
TACGATGTGGGTCCCAGGGATCAAACCTCAGATCGTCACACTTAGTGGCAAGCATTTTTACCCTCTGAGC  
CATCCTGTAGGCCCTAGAGCAGGGGATTTAAATGTGGCTGCAGCGTCCCTCAGGCCAAGCACAGACGA  
GGTGCTAAGAGGTTCCAAGTGATTATGTCAGGGTCATGAGACCTGTGGTCCCTGAAACCAGGTTGATCTAG  
GCTTGTGGCACCACAATGGCTTCTGGTCTGCTGCCCTCTGTGGATAAAGGGTATGGTTAACCCTGAAG  
TGGAGGGCCACAGCATGTTTCTGGACCTCTCCAAGTACTGAAACAAGTGCCAGGCGAGGCTAATGAGCT  
GTGCAGGTAAGGGCCTGGGAGCTCTGCTAGGCTTCCCCTTGCCCCATCGGTGCCTGCAGTGTGATGG  
CTGGTGTTCCTTGCAGTTTCTCATACTTGAATGTATGAG

### *Gadd45b*

GGGCTGCTTGGCGCTCACCGCTGGGCAGAGAGCCAGCTCAGGAACAGCCTCTGGCCAAGCGCTCCAGCCC  
CAACAGCTTAGCCTGCCCTGGGGCCATCCGAGGAGCCTACTGTATGCAGCTCCTGAGCGCGGACCACGGA  
CAGAACCTACTATGTGCAGCCTCTCAGCTTGTGCAGGACCCATGTGCAACCCTGAGCTCATGCACAACC

TACTGTGTGTGGTACCTAAGGCATCCAAGGTGCAAAGCCTACTTGTGCAATCCTAGTGTTCATGCACAAC  
CTATAACATGCATGCAGAGTGCAACAATTTATTCTGGGCAAATCCTGAGCAAATGTAAGGCCTACTGGGT  
GCAGTCCCTGAATGCTTGCAGAGCCTGCAGTGTTCAGCTCCTGAAAACGTGTGAAGTGACAAATCATC**GG**  
**AAGCA**GAGTACTTAGAGAGCCTACTGTGTTTCTTGGATTCTGAAAAAGCCTGTGTATGTAGCCTGCTGA  
GCATTGCAGGACCTACTGTGTGTGCAGCCCTTTCCAGTGTGTA**CACGC**TTGCCCGGCCACCCGTGCATA  
GCTTCGTTGTTGCCTGCAGTTTATGC**CACGC**TCAGCTCCTATTGTGTGCACACACTGACATGCTACACAC  
CGCACCTACTGTGGTGCAGGCATCCATGTGTATAAAACAAACCCCAAGAGAGAGCAGACACACACATTTAG  
GAGCTCTGTTGGTTGCTGGGCACAGCAGAATAAACAGCCATCAGCAGAGCCTCACACATTGGCCTGTCT  
GAACCAGTTCTCATCTGTAAAAGCCTCAGTGTGTGCACCAGGACAGAATAAGAGAGGTCTCTGTCCACTC  
TGGCTGCTCA**GGAAGCA**TGCATGTGCTTTGCACGGGCCAACTGCCCCCGAGCTTAGGAGGAAAAATAGAA  
ACAACCAGTATCAGCTTCACATCTCTGGGCCCTGTTGTGACGGGCTCTGCTTTGCATGAAACGGGTTCTG  
ACTCTGAG**GGAAGCA**TCTTACTGTTGGAGACTTGGCCAGGGAGGCCCTGGGAGGTGGCTTTAG**CACGC**TA  
AGCTGCGGGTGGGGTGGGCCCTTAAGGGTCTTCCAGGAAGTGCCAAAGGCAGGTGCAAGGGCAGGCAG  
TCTCCATGGGCAGTGTGCCAGTCTTGGCTTC

*Irs2*

TCCTGACAAGCTCTTTGGAGAAAGACAATAACAACATGGTAGCCAAGAGGGAGAAGGCCCAGGCAGCCGG  
TTGGCAATTAAGCCAA**GGAAGCA**CTAGTAAGAGTGGCATCCAAAGCCACCAATACTCCACTCTCCCTCC  
CCCATCCTCAAGGTCAAAGGGCCTCACCTTTACGACTGTGGCTTCCTTCAAGTGATGGGACAGGAAGTC  
GATGCTTGCATAGGTGCTGGCAGAGGGCAAAGCTCCAGTGCCTGGACCCCAACACACTCCGCTGGCGCCA  
GAGCCTCCGACGGTGCCGAGGAGCCCCCAAGGCTACGGGTCCGGCTCCAGGAGTCTTGTCTCCTGGCT  
GCGGCTGAGACTGCGCCAAGGACCCCTGCTCGCCTCTCACATCGATGGCGATATAGTTGAGGCCGTTCTG  
GAAACCACGGAGGTCTCTCTGCGCATGGGAGAACTGCTGCCTCCAGGACAGCCAATCAAAGCTCCGGGC  
TGACCGGGGTTCCACGGCCTAGCCTGTGGCACTGGGGGCACAGCCACCAAGGGCTGTGCCTGTCTGGGG  
ATGTGGGCGGCTCATCACCTCCTCCCAGGGTACTGCTGCCTTCACTGCTTTTCTGAGTGAGACATTTTC  
CACAGAGGCCGAATTGTGGCGCTTGAATTGTGGGCAAAGGATGGGGACACTGGGGTGACGGTGGTGGTA  
GAGGAAAAGGTCTCTGAACTGTGGCGACGACGTCCCCCTGTGGGTCTGCACGGATGACCTTAGCACCCC  
GGTGGGGGTGAGGGGCTGGCTGACTTGAAGGAAAGCCTCCACCCCAAGATACCTGATCCATGAGACTTAG  
CCGCTTCAAGCCCGATGTGGGACTGGCCACTCGGGCACCTTCTGGCTTTGGAGGTGCCACGATAGGTTGT  
GGCGGGGTTGCAGCCACACCAAAGGCCATCTCGGTATAGTACCATTATCCCAGGCTCGGAGGACATTG  
AGGAGCCAGCAGTGGGACCCTGGGAAGTGGCAGCTGATGCTGGAGGCAGGCGGTATAGGTCTCCCGGGGC  
AGGTGGCAGAGGCTGCTGTAAGGAGGAAGGGAAAGT**GGAAGGA**CGTGGGGGCAGTGGTGGGTATGGGGAT  
GAAGCCTCTGGAGAGAGAAGGCCATCCATGGAGCCTACTGTGTCCCCACTGCGGGTGTAGGCTTGGGGG  
ACTTGGGAGAATAAGTCCAGGTTTATATAGTCAGAGAGTGGAGAGCGCTGCCGGCTGTCTGCTGCTGGT  
GCCTGGGGTTCTGAACCCAGGGATGAAGCAGGACTACTAGCTGAGAGCAGTGAAGAAGATGAGGCCGCG  
GATGCCAGTAGTGGGGGGCAGGCGGAGACAGACGGGTACCTGCCTCACCAAAGTCAATGTTGATGTACT  
CGCCAGGGCTCTTGGGCTCTGTGGGTAGAGGGTACTCTTGCATGCTGGGAAGGGTCTGCAGTCCCTCTAG  
CGATAGGCGTGTAGGCCGCACTGCCCGACATCGCTGGCCAGGAAGCCCTCAGGGCGGCCACCGATGGCA  
CTCGGCCTCATGGAGGAAGGCACTGCTGAGTGTGAGGCTGGGTATGACTACCACCAGCTGCCCAAAGG  
TGCCAGCCCCTGGGGTGGCCTGGGGCTCCAGTCTCTCCTTCCAAGATCCGGCCACAGGGGAGCTCAT  
GAGCACATACTGGTCATTGTCTCCGCTGCAGGAACAGGGAGCCTTATAAGAGCGGGGCAAAGAGCTGTAG  
CAGTGGCCCGGGATGCCCTTGGAGCCCTCACTGCCTC**CACGC**AAAGCTGCTGAGAAGTCAGGTGGGGTCC  
CTGCAGTGCCTGCCTCGCTGGGGGACATGTTGAGGTAGTCCCCGTTGGGGAGTAGCTTAGGGTCTGGGTT

CTCCATAGACAGCTTGGAGCCACACCACATTTCGCATGTACCCA**CTGTCTTC**TGGGGAGCTCTCCGCTGGG  
GAGCTGGCTTTGTAGCCACCTCCGTTTACTGGGAAGTCTGCCCACCCCTGAAGGGGGTGTGGCACGG  
CTGCTCCGGAAGGGGGCAAGGCCGCTGCCAAGCGTGGCTGCAGGATCTGCTTGGGAGCAGA**CACGC**TTGT  
GGGGCTCATGGGCATGTAGTCATCGCTCTTGCAGCTATTGGGACCACCACTCCTA

*Klf15*

CATTTTTGAACATCTAAAGTCAACATCGAACAAGCAGCCTGTTTTTATTTGCTTAATCTGGAAACCCTAC  
AGAAGCCCAATACCTTGAGCTCAGAATGCAAAATGGCCTTTTCTTTCTCACCCCCTCTCTGACTCAAGG  
TA**GGAAGCA**GAGTCCAGGGGCTGGCGACTTTCAGGGCCTCCCCTCTCTGGCTCCCTCTCTCCTCGTGGCC  
TCAGCTGTTTCGCGGACAAGAGCGTTCCTTGTCTTATTCTTTTTCCAGGATCATTCTGGAAAATGTTTGAAA  
CCAGAAGTGCCCTGGATTGTGCAACGGGCCTGGAGAGGGAGGGCTCTTTTGCAAATAGGGTGTGCAACT  
TTTGAAAACATACTCGCCGGCCCCATTCTCCCTTGGGAT**GGAAGCA**GGATCTGGACATTTGGCCACAGGA  
GGCCTTGGGCAGGCAGCCGAGGGTGGAGGGCTGCAAGGCACTGGTAAGCAGTCCCTTCTAAC**CTGGCCTC**CC  
TTGTTCCCTCTCTGCAGTCACCACAGGCTCGGCCAGGCCAGCATGGTGGACCACCTGCTTCCAGTGGACG  
AGACCTTCTCGTCACCGAAATGCTCAGTGGGTTACCTAGGGGACAGGCTGGCCAGCCGGCAGCCATACCA  
CATGTTGCCCTCGCCATCTCGGAGGATGACAGCGATGTCTCCAGCCCCTGCTCTTGTGCCAGCCCTGAC  
TCGCAAGCCTTCTGTTCCCTGCTACAGTGCGGGTCCAGGCCCTGAGGCCAGGGCAGCATCTTGGATTTCC  
TCCTGTCCCAGGCCACACTGGGCAGTGGTGGTGGCAGTGGAGGTATTGGAGATAGCAGTGGCCCTGTGAC  
CTGGGGATCATGGAGGAGAGCCTCTGTGCCTGTGAAGGAGGAACATTTCTGCTTCCCTGAATTTCTGTCA  
GGGGACACTGATGACGTCTCCAGGCCCTTCCAGCCTACCCTGGAGGAGATTGAAGAATTCCTGGAAGAGA  
ACATGGAGGCTGAGGTCAAGGAGGCCCCAGAGAACGGTAGCAGGGACCTGGAGACCTGTAGCCAGCTCTC  
AGCTGGGTACACCGGAGCCACCTTCATCCAGAGTCTGCTGGGAGAGAGCGCTGTACCCCACCACCAGGT  
GGCAGAGTGGGGGTGGTGGCCAAAGTGCAGGTGAGGGCCAGCACATGATGGCCCCGTGCCGGTGTAC  
TGCAGATCCAGCCTGTTGCTGTGAAGCAGGAGGCAGGTACAGGGCCAGCCTCCCCAGGGCAGGCCCCAGA  
GAGCGTCAAGGTGCGCCAGCTTCTAGTCAACATCCAGGGGCAGACCTTTGCACTCCTGCCTCAAGTGGTA  
CCATCCTCCAACCTGAACCTGCCCTCAAAGTTTTGTGCGAATTGCGCCTGTGCCATTTGCCGCCAAACCTA  
TTGGCTCAGGATCCCTAGGGCCCGGCCCTG**CTGGCCTC**CCTTGTGGGCCAGAAGTTCCCAAGAACCAGC  
AGCAGAATTTCTCAAATGCACAAATGCACCTTTCCAGGCTGCAGCAAGATGTACACCAAGAGCAGCC

*Smtn*

CTGTCTAAGGAGCATCCTGCTCTGGCCTATCTCCCCAGGGGATCTCCCTCCTGCCTTGGCCCCCTGAAGC  
CAAGGCCAGCTCAGATATTATAGCACCTTCCCACCCACCCCCACGGCCTCTGCCTGTCAGGAGGGTAA  
GGAGAGCCAAAGTGGCAGCTGTTTTGGAGAGGCTTGGCCTGGTTGAGGCTGCAGGACAGCTGCCAGGGCA  
AGAGCCTGGCACTTCTTGTCCCAATCTTAGAGGGACAGCCTTAGAGGTACCTCACTATACTGTACCA  
GTCTGTACAGTGAAGTAACTGAGGCCGAGGCAGTGTGGTACATCGACAGACATTCAGCAGAGCCGGGC  
TCAAATCAATTCCTCCACGGGCTGACTTACGAGACTGCTCCTTCGAGAGGGGCCCCAGAAAGAGCTGC  
GGCGGGTGTAAAGGCAGGCGGGTGGGCCACGGGGTCCCAGCATCCTCAGCTGCCTGGAAGAGGGCCTC  
GGGGTCGGCAGCAGCCAGCAACAGCTCGCTGGGCTCTAGCTCAGACTCCAGGTCGGGCACAAGTGGAAACA  
CCCAGCCGTAAGCTCAGCACCTCCACCTGCCTGGTCAAGTGCATCGAGCCCGGCTCAGAGCTGCCGTCT  
CTGCTCGAAGCTCTTCGGCTGCCTGAGCCACTGGCTCTACAGTGGCCAGAGCTGCATCGGCTGCCTGGGT  
CACCGCTGACCGGCCCTGCTTCAGCCACCGTCTGCAGTTCCTTGTAAATGCCTGGCTCAACTGTTCTTCAAAG

GCTGCAGCCATCTCAGGCCAGGCCCTGGCACTCCGGGCATACTGCTAGTGGGGACTCTTTGGGGTACGA  
TGGTGGGACAGTAGCAGGGGCTGCTGCTGTCTATGCTGGCAGCTTCGCAGCTGGTCTGAGGGCGAAGGCA  
AGGGCAGTGAGCCTGCCCCGCCCTGCTGGCCTCCAGCCTGCCACCAGCCAGCTGGAGCAACTGCTCAA  
ATAGAAACCTATTCTGGGCTCCTCTGCGGAGGGGATGGAGGGGGATGGGTAGCCTGTTTCAGACAGGGGA  
CAGCCTGTTGCATGGCTCAAGGATTACTGAGGCCAGAGCCGATAGGTGGAGAAATGGAAGGAGCAGGGC  
ATGGACTGCTTAGTCCAGGTATATCAGCTGTGACACTTCTATTTGCTGGACTCCTGCATATATCTGCTCT  
CGTGCCCCATTATTTAGAAAGCCTTGAACAAGTCAAGACAATGGAGGCCAGGAAGATGGGACTTTAAG  
CTCTCTGTTGGAATGGGGCTTGTCCCTGACAGACATGTCCTCTAGCCCAGCCAGTGTGCCCAAATCCAA  
CCCTGGACTCTGCACAAGTGCATTACAGACACATCTGTTTCGCCTCAGATGGGGAGACGGGTGAGTTAGGG  
CCAGAGCCACGTCTCCATTACCCACAAGGGCCCCCTCACGACAGCCACCCCAACCTACTGGGTCTCTGCTTT  
GTTGCCAAAAGACTGATCTTGTTCACATTCTCATCCTGTTACCCCTCTGAAGGCCCAAAGCGGACCATCT  
GACCACCTCACCTCAGTCAAAGTCCCATTCCGTCTTTCATACAGCACAAAGGACATTACCTGGGCAGCCC  
ACAGGGAATCTCTTTCCAGCTGAGCTCCCAACCAGTTGATCCTGAGCTTGGGAATGAATAATAGAAGGA  
ATGCCTCGGATTCATTTCCCATGGCACCTGCTAGGCTGATGCCTCGCTTGGCCAGTGCCCCCTGCCTGC  
TGTCTTCATCAGTGGCTCTGCCCCGCTCCATGGCAAAGATGCTAATCAACAATCTCCTAATGGACTAGG  
CTGAGCTTGGATTAGCGTGGGATCTGATCCAACAGTGGGGCTGATGTTTCAGTGTGGGGTGGGGACGGGG  
GTATATATGGCAGAGACTGCCGTAGGAAGAGGGCCAAAGCCCCTACTACACTGTCCATGAGCTGCAGCAT  
TCACACTTGTTCATTAAGAGTGAGCTGCTCAACTTAGGTGCCAGGATCAAAGATTAGCAAGTGGATCCAG  
GCACAGTGGCTCACGTCTGCAATGCCAGCACCCAGGAAGTAGAGGCTGGACGATCACGGAGTCCAAGGTC  
AGCTCTGGCTATATACTTAGTTTCGATGCCAACCCAGGATACAAGAGACTCGACATCAAACAAAACTAAC  
AACAAAAGATCAGCATATGGGAAGAATGACCTCAGCCACACCTCTGGGTAACATAGCATGGATCAGTCTT  
AGATCAGTCTTAGCCATGTCACCAACTGTGGATGGACTATTAGTCTCTCTGGCCTCAGTTTCTTTGTATG  
CACCATAGAGAATGCCCGCTACACCCGTAAGCTGTCCCTGGAGATGGTGAACAGTGAGGCTGGTGGATT  
GTGGAGAGGCTCACCTTAAAGTTGCAGCCTCCTCGGTTACCAGGGGAGGCATGGCTGAAGGTAGTGACGT  
GAGTGACACTGCCAGTCCGGTCCAGTCCCAGGGTTGCTGATGTGGGTGATGGTGTCTTGGCCCCACT  
GCTGGTGTGAGAAGGGTTGGGGGTGCCCGCAATCCCAAAGTCAATCTGGAGGGGAGAGGGATGCTGTT  
GGGGCCAGGTGGAATGTAGGCAGTGCCAGTCATGGTGGAGCCACACCCTGGACACTGGCCGCAGCACCTGC  
CGCACCAGCAGAATCAGGAGTTGGGGGTGCAAGCACTCCACCCAGCAGTGAGAAACCTACCTGCTCTCT  
GGTTGCCTGTGGGCAGCAGCACCCGGCCTGTGGAGGCCTGACCACGGCCATCCTTGATCTCAATGGTAAA  
CGTAGTCTTCATACTGCCCCCTGGCTCCCCAGTGCCAACGGCCACGGGCGGTGGGGTACTGGGCTCTTCT  
GAGCAGGGCTTG

*Spns2*

TGGCAAAGCAGAATGCTAGGACACTCAATGGCTGGGGGAGGAGTCTGGCAGGCAGAACCACCTCAGTG  
CCAGCCTGGCACTACCAGCCTCCTAGCCACAACCTGAGACTAGAGACAACCATGCCCTGCCCTCAATA  
TCTACCTGCTCAATTCTGTTTCCAGGCCTCTCCAGATCCGACCCCTGTATATCCGCCGTCCCCTCCCTG  
CCTCTGGGTTACCTCTCCCAGCAGCAAGTACTGCTTATTCTTCACCCACCCGCCAAGCTACCGCAATG  
AAATTTAGAAGCCTGGGTGAGTCCAGCCATAGTGAATGTAGCCTTCTTGGCTTACCATGAGGATGTCTGC  
AGTGATGGCCCAGTTAGAAAACAGCAGTGTCTCTCAACAAAAATGCAGATCTATTACAGAGAAGAAAG  
CAACCATGGAGGGCACAGGGCAGGGACACAGGACCCTCCCTATGGGGGACAGAGGGTCCAGCAAGTCAGA  
CTGCACCTCTAGCCCATCTTCCCCAACCTCCTGTGGACTCACATAAGCGCCTACAATGCTGGTCTTGGCA  
GCCACAAAGATGAGGCAGATGAAGATGGCGGATCCCAGCATGCCACAGCACACACCAATGGGTGAGC  
GTGAGTCCGCAGGCGGCACCAACGAGTGGCTCCCGCGCCCGTGACTACGCCAGGAAGCCAGTAAAGCA



GGTAATGGCTCCAAAGATGAGGCTGTGGGGACAAAAGACAGCAGAGTGTGGTTTGAGCAAGGCTAAGGTT  
GAGACAGAGGCATCTGTCCCTTGGGTCCAGGCTTTACCTGTCTTTGGCTCCACAGGGCGGGCTGTTGCAA  
GTCTCTGCTGTCTTTTGTACAACCTTGAGCACGGTGAAGATAGAGGGGAATCCACATGCCCAGGGCCCCTG  
TGGCGAAGGACACAGCGGATGTGGCCAGGGAGGAGAAGACGTAACCTGCGGCTGGGGAGAATCCAGGGAGG  
GAAACTGAGCTGGGGCAGCAGGCAGCCCTTACACCAGGGCCCAGGAGGCAGCCTATTCCCCTCTAGCCAG  
CTACCTGCTCCTTCCCCAAACAGAAATGCGCTTTCTCAGGCCCAGCTGAGGGTTCAGGATGCAGGAACAA  
TAAACTCTCAGGCCAAAATGTCATTCAGCACTACGGGCAGTGTAGACGGCAGGTGAGTGTGGTGGGCGTG  
CTCTCAGCCACGCTCCTCCCACCACACCCTGTGTGGTAGCACTCACTTTTCGGATCAGGGCCTTCATGTC  
TCGAAGCCAGGAGGTCCGTGCTTTGAGCTGCCCCCAAGTTGATCAGCATGGCCTCTCTTAGTGGCTGGG  
ACCAAGATGAGGATGAGTGTTTCTGTGATCATGCCCAGGACGGGGGAAACCTGATAGGATGGGAAACGTG  
AAGTTTGAATGCTGTCTATGCTGCATAGGAGGGCCAGGCAACTTACCTGGGCTCCGGGCCCTTTTACTA  
GGCTAATAATCTCTGCCCAGCTGAGTAACAGAAAGGCTGAGCAAAGCCCCTGGGGATGAGGCCAGGGGAA  
GGGTTAGAGGGCTCAAAGTGGACAGTCCAGACCAAAGGCAGGGCAGGAAAACAAGTTCAAGG
