# Supplementary material
Source: PubMed Central journal article supplement (PMC4713261)

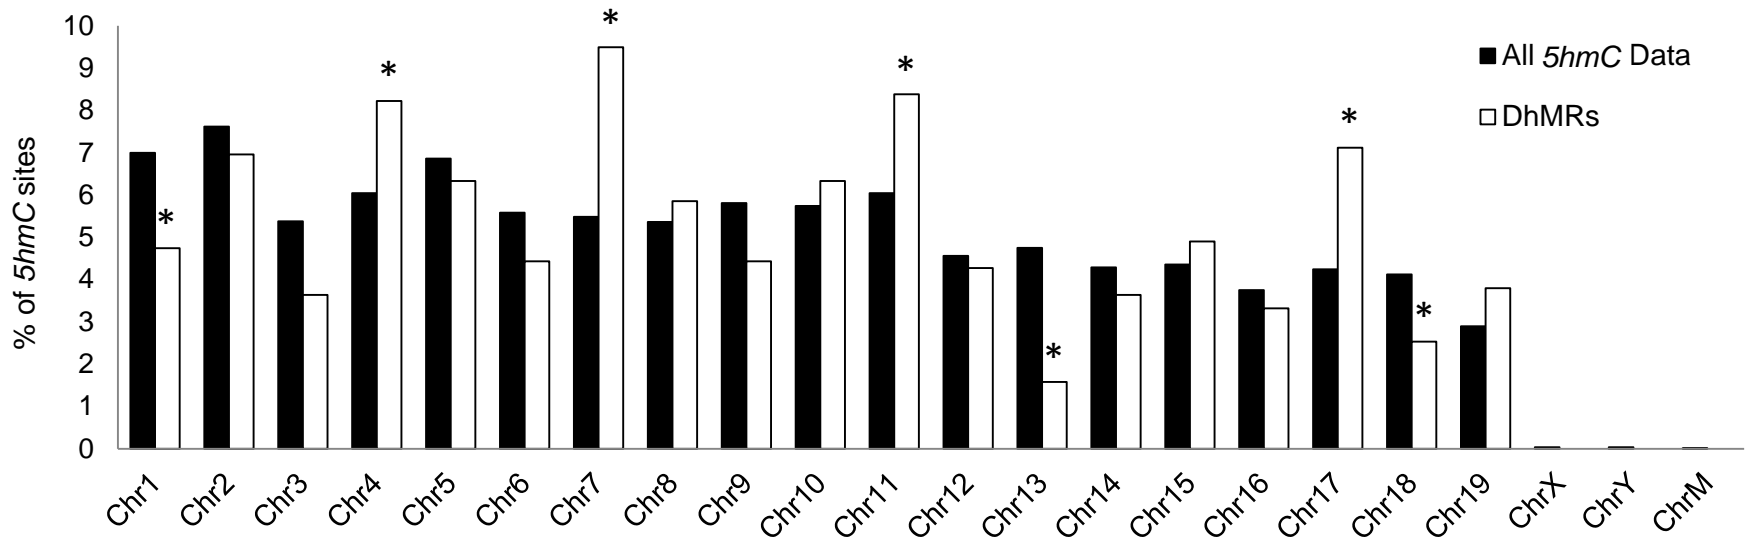

Supplement: NIHMS742595-supplement-1.pdf [file NIHMS742595-supplement-1.pdf]

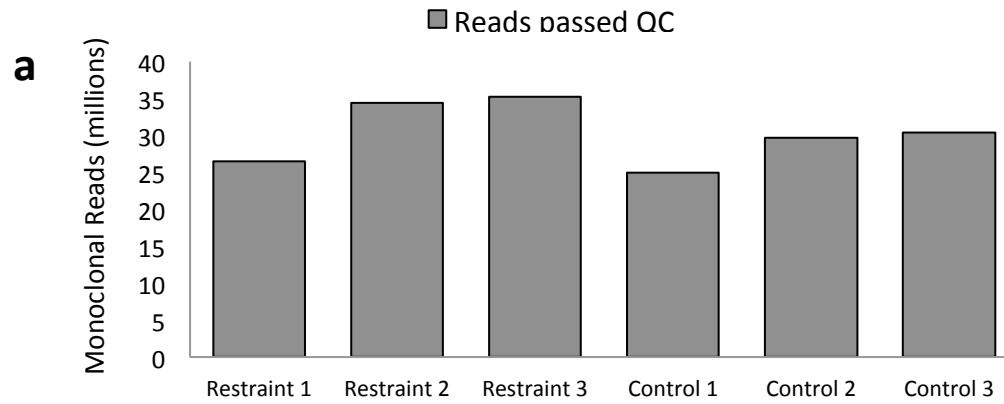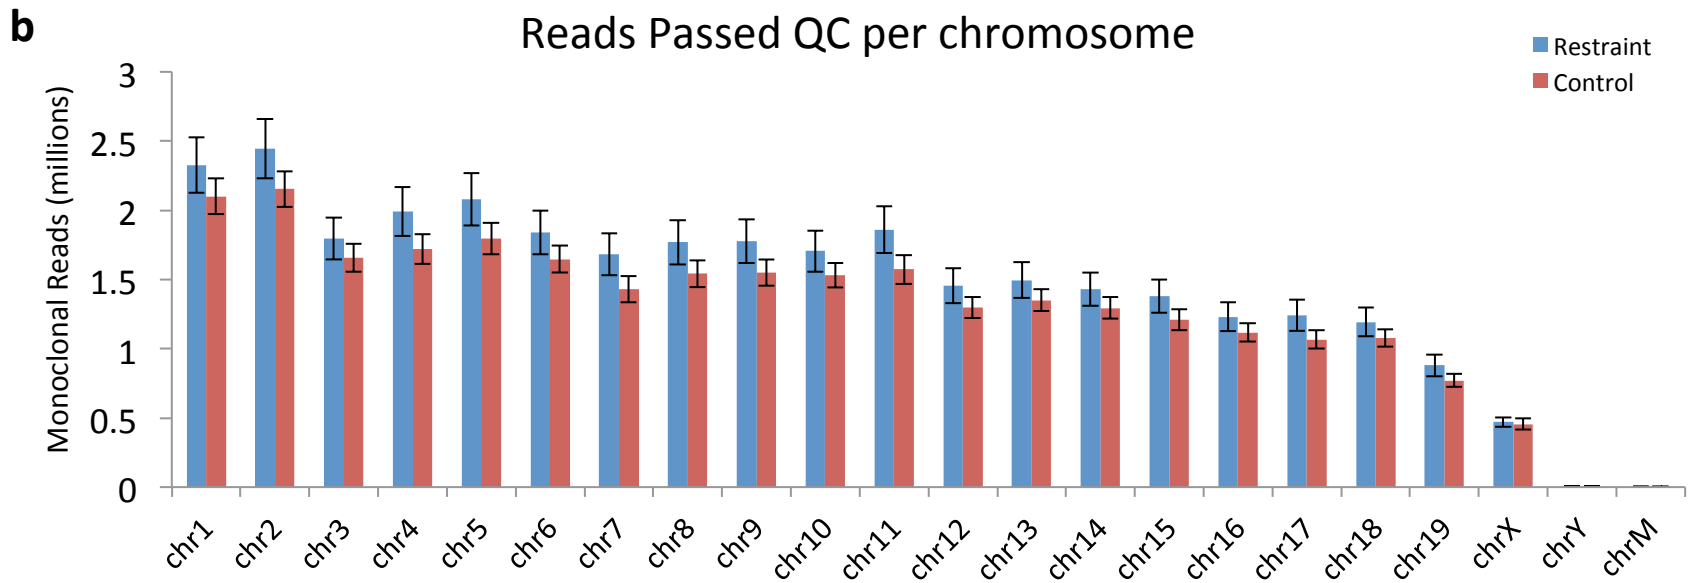

Supplement: NIHMS742595-supplement-3.pdf [file NIHMS742595-supplement-3.pdf]
